# Supplementary material for: Implications of dust minerals on radiative transfer at regional scale, using the METAL-WRF model
Source: Copernicus journal article supplement (doi:10.5194/egusphere-2025-3570), 2025-08-08
Supplement: Supplementary file 1 [file egusphere-2025-3570-supplement.pdf]

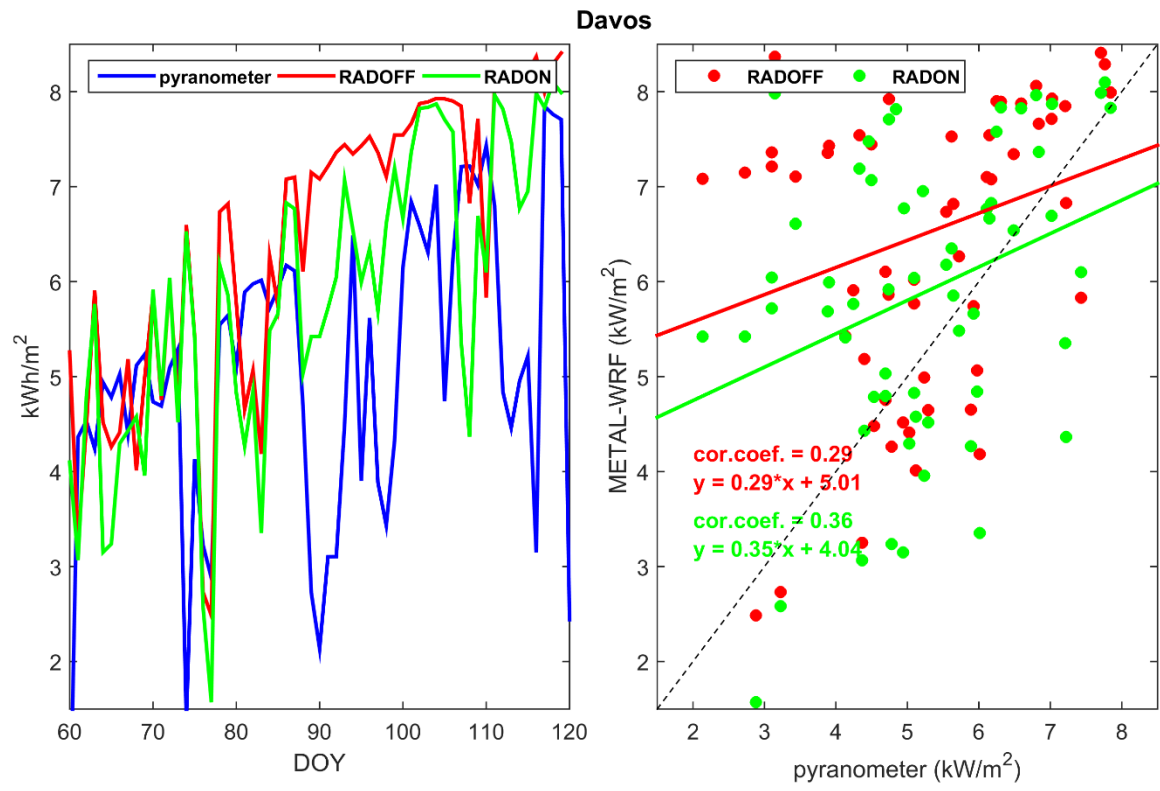

690

**Figure S1. Daily GHI with respect to the day of year (DOY) 0f 2022, as it was calculated from the pyranometer measurements (blue), the METAL-WRF RADOFF (red), and the METAL-WRF RADON (green). Right: Correlation between the daily GHI from the pyranometer and the METAL-WRF RADON (green). Right: Correlation between the daily GHI from the pyranometer and the model for RADOFF (red) and RADON (green). The results presented are for Davos.**

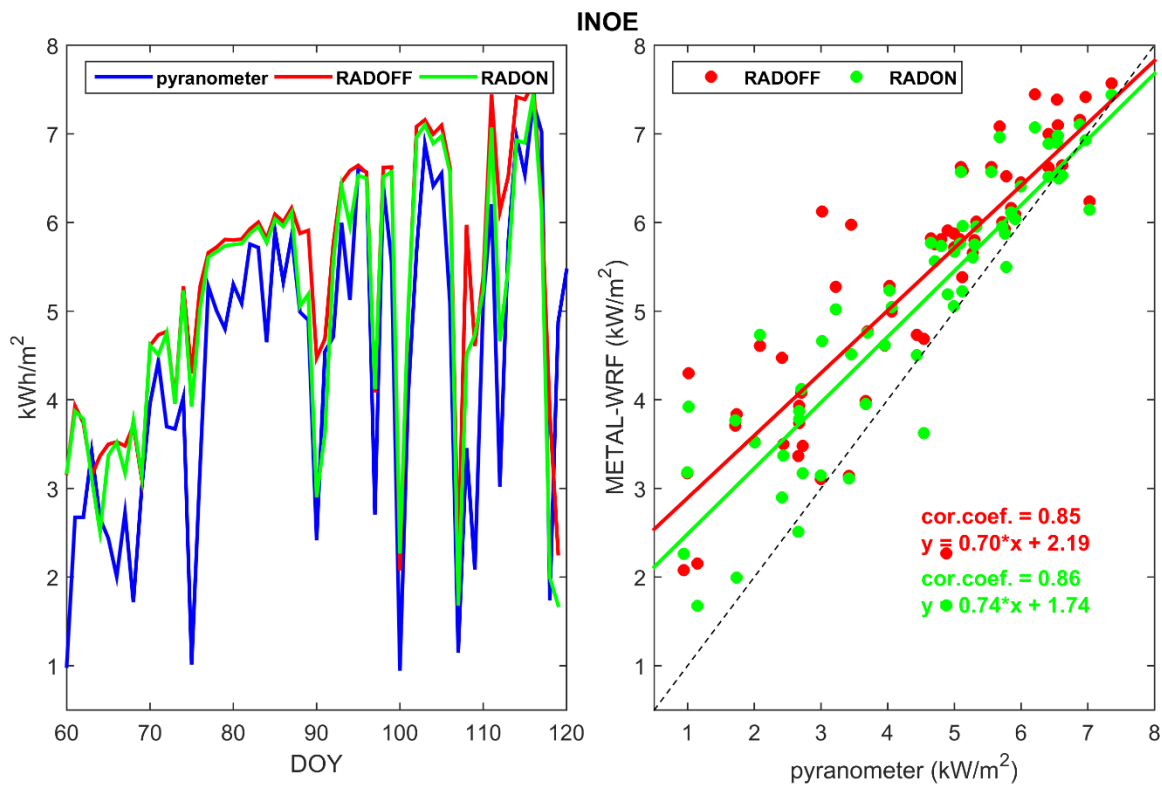

695 **Figure S2. Daily GHI with respect to the day of year (DOY) of 2022, as it was calculated from the pyranometer measurements (blue), the METAL-WRF RADOFF (red), and the METAL-WRF RADON (green). Right: Correlation between the daily GHI from the pyranometer and the METAL-WRF RADON (green). Right: Correlation between the daily GHI from the pyranometer and the model for RADOFF (red) and RADON (green). The results presented are for Magurele (INOE).**

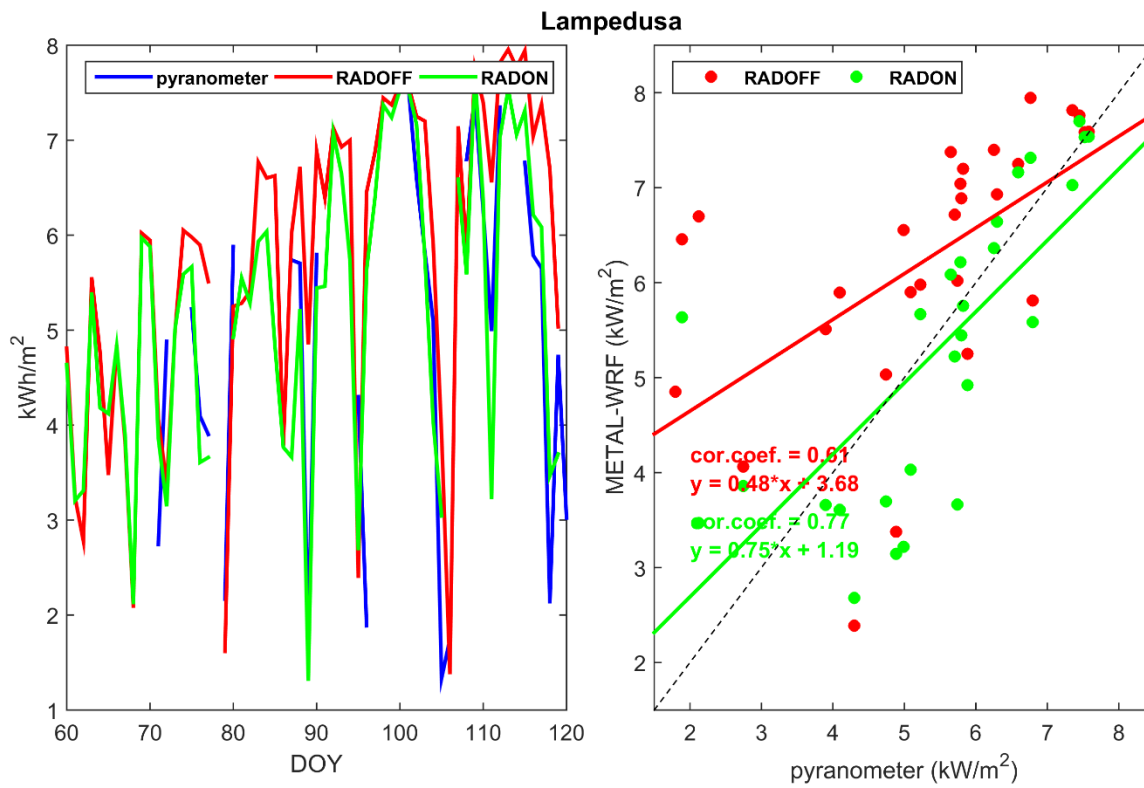

700 **Figure S3. Daily GHI with respect to the day of year (DOY) 0f 2022, as it was calculated from the pyranometer measurements (blue), the METAL-WRF RADOFF (red), and the METAL-WRF RADON (green). Right: Correlation between the daily GHI from the pyranometer and the METAL-WRF RADON (green). Right: Correlation between the daily GHI from the pyranometer and the model for RADOFF (red) and RADON (green). The results presented are for Lampedusa.**

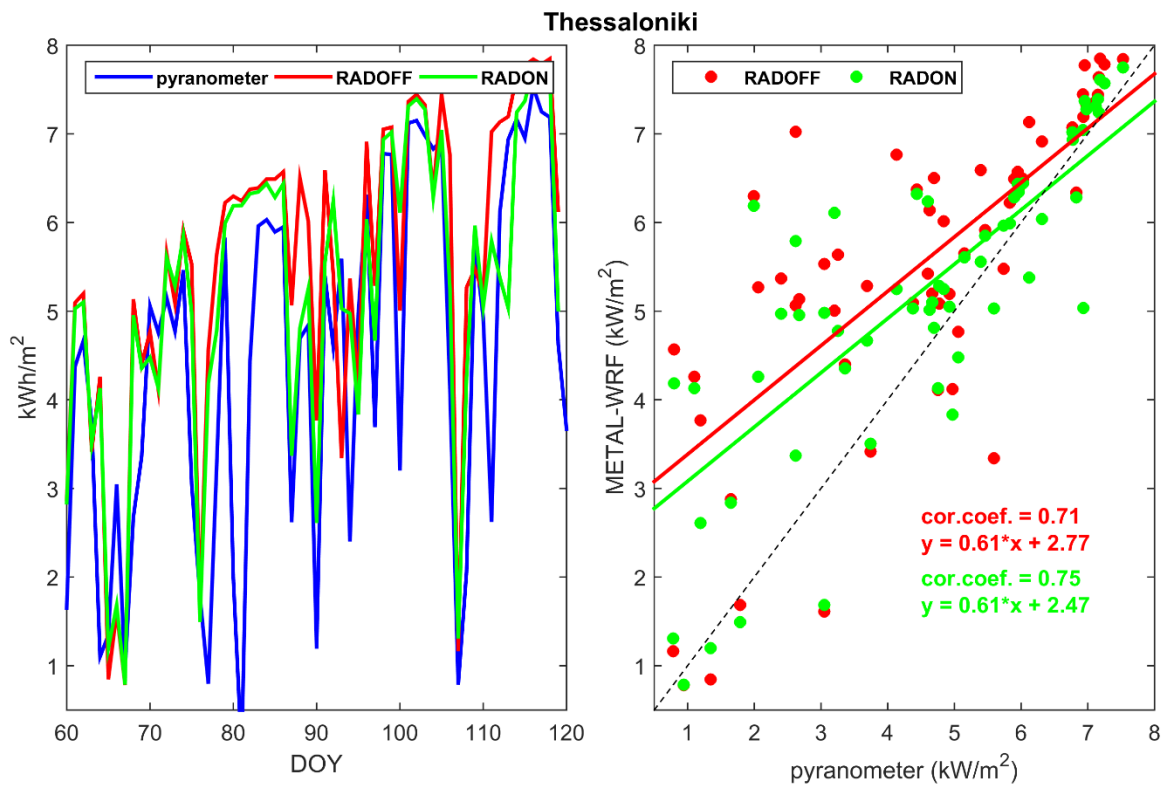

Figure S4. Daily GHI with respect to the day of year (DOY) 0f 2022, as it was calculated from the pyranometer measurements (blue), the METAL-WRF RADOFF (red), and the METAL-WRF RADON (green). Right: Correlation between the daily GHI from the pyranometer and the METAL-WRF RADON (green). Right: Correlation between the daily GHI from the pyranometer and the model for RADOFF (red) and RADON (green). The results presented are for Thessaloniki.
